# Supplementary material
Source: Springer Nature journal article supplement (https://www.springermedizin.de/resource/supplementary/12902_2012_134_MOESM2_ESM.pdf/9515570)

A

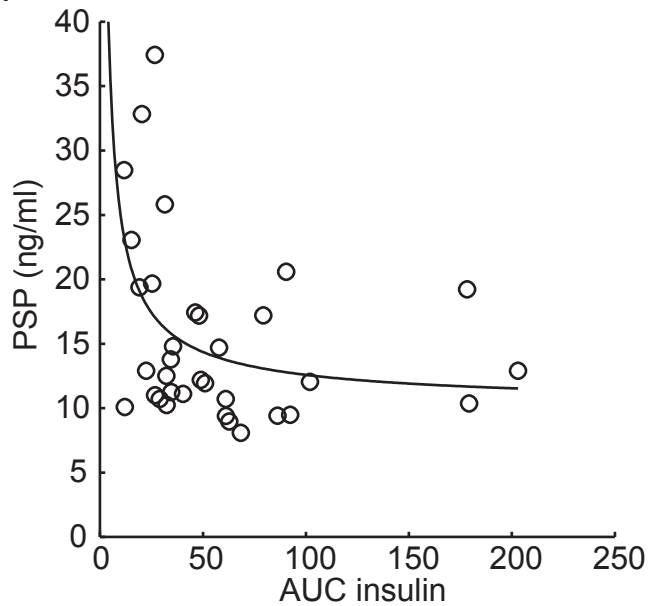

B

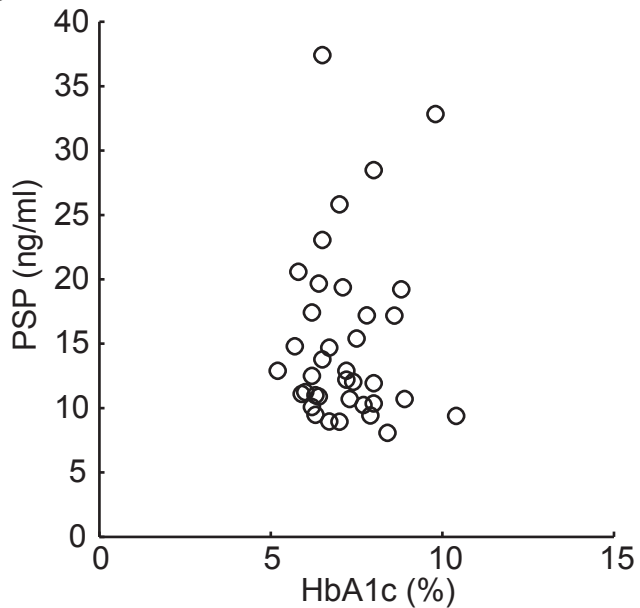

Supplement: MOESM2 [file 9515570]
